# Supplementary material for: Transcriptome Analysis Reveals Critical Genes and Pathways in Carbon Metabolism and Ribosome Biogenesis in Poplar Fertilized with Glutamine
Source: MDPI journal article supplement (doi:10.3390/ijms23179998), 2022-09-02
Supplement: s1 [file s1]

**Table S1. Primer sequences used for qRT-PCR analysis**

| Gene id            | Gene function                         | Gene name      | Primer sequence-FW    | Primer sequence-RV    |
|--------------------|---------------------------------------|----------------|-----------------------|-----------------------|
| POPTR_005G079200v3 | aspartate<br>aminotransferase         | <i>AspAT1</i>  | GCAGAGGTTGAAGGGTTTGG  | TGTAGGGTGGTCAGAGAAGC  |
| POPTR_006G241600v3 | aspartate<br>aminotransferase 3       | <i>AspAT4</i>  | GTTGCAGGCAGGGTTGAAAG  | GGCTTCAAAGAGTTTCTGGCG |
| POPTR_006G260200v3 | aspartate<br>aminotransferase 5       | <i>AspAT5</i>  | TGCACGTGGTATGGAGCTTT  | TCGGGCAATCCTTTTCAGCT  |
| POPTR_014G143300v3 | aspartate<br>aminotransferase 1       | <i>AspAT7</i>  | AGCAATCCTCCTGTTCAT    | CAGCCATTACCTTCACTTC   |
| POPTR_018G022200v3 | aspartate<br>aminotransferase 5       | <i>AspAT9</i>  | TCCTCCTGTTCATGGGGCTA  | CCTCCCAGCCATCATTTCCA  |
| POPTR_018G082500v3 | aspartate<br>aminotransferase 2       | <i>AspAT10</i> | CACTGGCTTGAACACTGAACA | AAAAGATCCCCAGAAGCGGA  |
| POPTR_005G172400v3 | nitrate reductase 2<br>NADH-dependent | <i>NIA2.2</i>  | AATGCCGAAGCCTGGTGG    | CATGACTCGGCGTCGTTATC  |
| POPTR_012G011700v3 | glutamate synthase<br>1               | <i>GOGAT2</i>  | GGGAACCACTGGTAACCGAAG | AATCGTGAGTGCACCAACTC  |
| POPTR_006G038400v3 | glutamate synthase<br>1               | <i>GOGAT1</i>  | GTCCAGTCAACGCCACTCTC  | CAAGTTTGCTACCTGCGGTT  |
